# Supplementary material
Source: publisher figshare collection journal article supplement (https://acs.figshare.com/ndownloader/files/4341100)
Supplement: Supplementary file 1 [file 4341100]

## Supporting Information

### **Unraveling the Bastarane and Isobastarane Oximo Amide Configurations and Associated Macrocyclic Conformations – Implications of Their Influence on Bioactivities<sup>†</sup>**

Wayne D. Inman<sup>\*</sup> and Phillip Crews<sup>\*</sup>

*Department of Chemistry and Biochemistry, University of California, Santa Cruz,  
California 95064*

---

<sup>†</sup> Dedicated to Dr. Koji Nakanishi for his pioneering work in natural products.

<sup>\*</sup> To whom correspondence should be addressed.

E-mail: [winman@ucsc.edu](mailto:winman@ucsc.edu); [phil@ucsc.edu](mailto:phil@ucsc.edu).

**Contents**

**Figure S1.** Superimposed view of low energy conformers of (*E,Z*)-psammaplin A

Pg 3

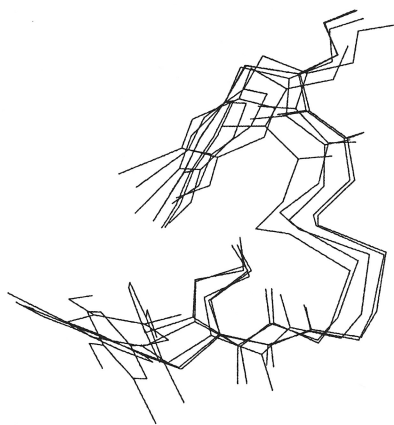

**SI Figure 1.** The superimposed view of low energy conformers of (*E,Z*)-psammaphlin A showing the intramolecular hydrogen bond between the (*Z*)-oxime H to the phenol O.
